# Supplementary material for: Expected Labor Market Affiliation: A New Method Illustrated by Estimating the Impact of Perceived Stress on Time in Work, Sickness Absence and Unemployment of 37,605 Danish Employees
Source: MDPI journal article supplement (doi:10.3390/ijerph18094980), 2021-05-07
Supplement: s1 [file s1]

## Supplementary material

Table S1A. Expected average number of days (95% confidence interval) spent in the four recurrent labor market affiliation states (ELMA estimates) for women divided by age group.

| Women - ELMA 4 year follow-up, estimated in days (95% CI) |                       |                                |                        |                     |                    |                     |                    |               |               |
|-----------------------------------------------------------|-----------------------|--------------------------------|------------------------|---------------------|--------------------|---------------------|--------------------|---------------|---------------|
| Age                                                       | Variable              | Level                          | Work                   | Sick                | Unemployment       | Temp. Out           | Disability Pension | Pension       | Death         |
| 18-39                                                     | Intercept             | Reference                      | 1227.4 (1226.2:1228.6) | 44.3 (43.9:44.6)    | 18.0 (17.8:18.3)   | 134.7 (134.4:135.0) | 0.0 (0.0:0.0)      | 0.0 (0.0:0.0) | 0.0 (0.0:0.0) |
|                                                           | Stress                | No                             | . (-)                  | . (-)               | . (-)              | . (-)               | . (-)              | . (-)         | . (-)         |
|                                                           |                       | Work-related                   | -50.8 (-52.8:-48.8)    | 44.6 (43.6:45.6)    | 12.1 (11.7:12.6)   | -11.5 (-12.2:-10.9) | 0.0 (0.0:0.0)      | 0.0 (0.0:0.0) | 0.0 (0.0:0.0) |
|                                                           |                       | Work and personal life-related | -61.9 (-64.0:-59.9)    | 33.8 (32.8:34.7)    | 5.6 (5.4:5.9)      | 13.1 (12.6:13.6)    | 0.0 (0.0:0.0)      | 0.0 (0.0:0.0) | 0.0 (0.0:0.0) |
|                                                           | Education             | Low                            | -36.8 (-38.8:-34.8)    | 14.7 (13.9:15.4)    | 11.7 (11.0:12.4)   | 6.6 (6.0:7.1)       | 0.0 (0.0:0.0)      | 0.0 (0.0:0.0) | 0.0 (0.0:0.0) |
|                                                           |                       | Middle                         | . (-)                  | . (-)               | . (-)              | . (-)               | . (-)              | . (-)         | . (-)         |
|                                                           |                       | High                           | 37.7 (36.7:38.7)       | -18.6 (-18.9:-18.3) | -6.8 (-7.0:-6.6)   | -11.9 (-12.2:-11.6) | 0.0 (0.0:0.0)      | 0.0 (0.0:0.0) | 0.0 (0.0:0.0) |
|                                                           |                       | Not Available                  | -222.6 (-245.5:-199.6) | 180.4 (156.8:204.0) | -10.9 (-12.4:-9.5) | 80.9 (70.4:91.4)    | 0.0 (0.0:0.0)      | 0.0 (0.0:0.0) | 0.0 (0.0:0.0) |
|                                                           | Employment sector     | Private                        | . (-)                  | . (-)               | . (-)              | . (-)               | . (-)              | . (-)         | . (-)         |
|                                                           |                       | Public                         | -75.6 (-76.7:-74.5)    | 29.2 (28.8:29.6)    | 2.3 (2.1:2.5)      | 33.4 (33.1:33.6)    | 0.0 (0.0:0.0)      | 0.0 (0.0:0.0) | 0.0 (0.0:0.0) |
|                                                           |                       | Not Available                  | 2.8 (1.4:4.3)          | -0.5 (-1.1:0.1)     | 13.6 (13.0:14.2)   | -9.9 (-10.7:-9.2)   | 0.0 (0.0:0.0)      | 0.0 (0.0:0.0) | 0.0 (0.0:0.0) |
|                                                           | Work-time arrangement | Full-time                      | . (-)                  | . (-)               | . (-)              | . (-)               | . (-)              | . (-)         | . (-)         |
|                                                           |                       | Part-time                      | -16.2 (-17.2:-15.1)    | 4.6 (4.2:4.9)       | 5.3 (5.2:5.4)      | 16.0 (15.8:16.3)    | 0.0 (0.0:0.0)      | 0.0 (0.0:0.0) | 0.0 (0.0:0.0) |
|                                                           |                       | Not Available                  | -166.6 (-168.2:-165.1) | 16.6 (16.2:17.0)    | 44.4 (43.7:45.0)   | 76.1 (75.5:76.8)    | 0.0 (0.0:0.0)      | 0.0 (0.0:0.0) | 0.0 (0.0:0.0) |
|                                                           | AH-survey             | 2012                           | 8.3 (7.2:9.4)          | -7.6 (-8.0:-7.3)    | 8.8 (8.5:9.0)      | -5.4 (-5.7:-5.1)    | 0.0 (0.0:0.0)      | 0.0 (0.0:0.0) | 0.0 (0.0:0.0) |
|                                                           |                       | 2014                           | . (-)                  | . (-)               | . (-)              | . (-)               | . (-)              | . (-)         | . (-)         |
|                                                           |                       | 2012 + 2014                    | 73.8 (72.5:75.2)       | -14.4 (-14.9:-14.0) | -2.3 (-2.5:-2.1)   | -52.2 (-52.6:-51.8) | 0.0 (0.0:0.0)      | 0.0 (0.0:0.0) | 0.0 (0.0:0.0) |
| 40-49                                                     | Intercept             | Reference                      | 1330.0 (1327.7:1332.3) | 61.5 (60.9:62.0)    | 20.0 (19.6:20.4)   | 26.1 (25.7:26.4)    | 3.5 (3.3:3.7)      | 0.0 (0.0:0.0) | 1.0 (0.9:1.2) |
|                                                           | Stress                | No                             | . (-)                  | . (-)               | . (-)              | . (-)               | . (-)              | . (-)         | . (-)         |

|  |                       |                                |                                |                        |                    |                     |                  |                     |                  |
|--|-----------------------|--------------------------------|--------------------------------|------------------------|--------------------|---------------------|------------------|---------------------|------------------|
|  |                       | Work-related                   | -76.7 (-79.8:-73.6)            | 51.5 (50.2:52.8)       | 5.7 (5.1:6.3)      | 13.5 (12.9:14.1)    | 3.5 (2.9:4.2)    | 0.0 (0.0:0.0)       | -1.5 (-1.7:-1.2) |
|  |                       | Work and personal life-related | -81.3 (-85.2:-77.3)            | 41.7 (40.6:42.9)       | 1.9 (1.5:2.4)      | 1.5 (0.8:2.1)       | 4.7 (4.2:5.3)    | 0.0 (0.0:0.0)       | 6.2 (5.7:6.8)    |
|  | Education             | Low                            | -206.7 (-217.4:-196.1)         | 22.7 (20.5:24.9)       | 28.7 (27.2:30.2)   | 0.1 (-0.8:1.0)      | 10.3 (9.3:11.4)  | 0.0 (0.0:0.0)       | -1.7 (-2.1:-1.3) |
|  |                       | Middle                         | . (-)                          | . (-)                  | . (-)              | . (-)               | . (-)            | . (-)               | . (-)            |
|  |                       | High                           | 36.1 (34.4:37.8)               | -25.2 (-25.6:-24.8)    | -9.7 (-9.9:-9.4)   | 11.9 (11.6:12.2)    | -2.5 (-2.7:-2.3) | 0.0 (0.0:0.0)       | -1.8 (-2.0:-1.6) |
|  |                       | Not Available                  | -119.9 (-148.7:-91.0)          | 70.0 (57.5:82.6)       | -10.5 (-11.6:-9.5) | -8.7 (-11.0:-6.5)   | 16.8 (10.2:23.4) | 0.0 (0.0:0.0)       | 15.2 (8.0:22.3)  |
|  | Employment sector     | Private                        | . (-)                          | . (-)                  | . (-)              | . (-)               | . (-)            | . (-)               | . (-)            |
|  |                       | Public                         | -42.7 (-45.3:-40.0)            | 27.9 (27.3:28.5)       | -0.8 (-1.2:-0.5)   | -5.4 (-5.8:-5.1)    | 2.6 (2.3:2.8)    | 0.0 (0.0:0.0)       | 4.0 (3.8:4.2)    |
|  |                       | Not Available                  | 53.7 (49.2:58.1)               | -20.3 (-21.2:-19.3)    | -5.9 (-6.5:-5.3)   | 1.5 (1.0:2.0)       | -2.0 (-2.3:-1.6) | 0.0 (0.0:0.0)       | 3.8 (3.5:4.1)    |
|  | Work-time arrangement | Full-time                      | . (-)                          | . (-)                  | . (-)              | . (-)               | . (-)            | . (-)               | . (-)            |
|  |                       | Part-time                      | -16.7 (-18.5:-15.0)            | 13.2 (12.8:13.6)       | -1.7 (-1.8:-1.5)   | 1.7 (1.5:1.9)       | 0.7 (0.5:0.9)    | 0.0 (0.0:0.0)       | -1.3 (-1.4:-1.2) |
|  |                       | Not Available                  | -413.3 (-430.7:-396.0)         | 59.9 (55.8:63.9)       | 56.8 (54.1:59.6)   | 40.9 (38.5:43.4)    | 15.9 (14.1:17.7) | 0.0 (0.0:0.0)       | 22.0 (20.2:23.7) |
|  | AH-survey             | 2012                           | -7.9 (-10.6:-5.3)              | 10.3 (9.6:10.9)        | -3.5 (-3.8:-3.1)   | -5.2 (-5.6:-4.8)    | 2.6 (2.3:2.8)    | 0.0 (0.0:0.0)       | 2.1 (1.9:2.3)    |
|  |                       | 2014                           | . (-)                          | . (-)                  | . (-)              | . (-)               | . (-)            | . (-)               | . (-)            |
|  |                       | 2012 + 2014                    | 29.9 (27.1:32.7)               | -13.7 (-14.2:-13.1)    | 0.7 (0.3:1.1)      | -13.3 (-13.6:-13.0) | -3.8 (-4.0:-3.6) | 0.0 (0.0:0.0)       | -2.2 (-2.4:-2.1) |
|  | 50-59                 | Intercept                      | Reference                      | 1330.9 (1329.3:1332.5) | 33.3 (32.9:33.6)   | 18.5 (18.3:18.7)    | 13.1 (13.0:13.3) | 0.0 (0.0:0.0)       | 26.2 (26.0:26.4) |
|  |                       | Stress                         | No                             | . (-)                  | . (-)              | . (-)               | . (-)            | . (-)               | . (-)            |
|  |                       |                                | Work-related                   | -103.1 (-105.7:-100.6) | 45.6 (44.8:46.5)   | 10.6 (10.3:10.8)    | -0.4 (-0.7:-0.2) | 0.0 (0.0:0.0)       | 7.8 (7.4:8.2)    |
|  |                       |                                | Work and personal life-related | -53.0 (-55.8:-50.1)    | 24.2 (23.6:24.8)   | 13.1 (12.7:13.4)    | -2.9 (-3.1:-2.7) | 0.0 (0.0:0.0)       | -8.5 (-8.9:-8.2) |
|  | Education             | Low                            | -71.3 (-73.7:-69.0)            | 25.2 (24.6:25.7)       | 11.1 (10.7:11.4)   | -2.3 (-2.5:-2.1)    | 0.0 (0.0:0.0)    | 16.2 (15.8:16.6)    | 2.2 (2.0:2.4)    |
|  |                       | Middle                         | . (-)                          | . (-)                  | . (-)              | . (-)               | . (-)            | . (-)               | . (-)            |
|  |                       | High                           | 19.0 (17.6:20.4)               | -3.0 (-3.3:-2.7)       | -8.0 (-8.2:-7.8)   | 0.5 (0.3:0.6)       | 0.0 (0.0:0.0)    | 1.0 (0.8:1.2)       | -0.4 (-0.5:-0.3) |
|  |                       | Not Available                  | -2.2 (-28.2:23.9)              | -23.7 (-30.2:-17.2)    | 2.5 (-2.3:7.3)     | 10.9 (6.4:15.4)     | 0.0 (0.0:0.0)    | -25.4 (-29.3:-21.6) | -2.5 (-4.2:-0.9) |
|  | Employment            | Private                        | . (-)                          | . (-)                  | . (-)              | . (-)               | . (-)            | . (-)               | . (-)            |

|  |                       |               |                        |                     |                   |                     |               |                  |                  |
|--|-----------------------|---------------|------------------------|---------------------|-------------------|---------------------|---------------|------------------|------------------|
|  | sector                | Public        | -50.8 (-52.6:-49.1)    | 24.9 (24.6:25.1)    | 1.3 (1.0:1.5)     | 8.8 (8.7:8.9)       | 0.0 (0.0:0.0) | 11.8 (11.5:12.0) | 0.7 (0.6:0.8)    |
|  |                       | Not Available | -5.0 (-7.3:-2.6)       | -11.7 (-12.4:-11.0) | 2.9 (2.5:3.3)     | 15.4 (15.1:15.8)    | 0.0 (0.0:0.0) | 5.9 (5.6:6.2)    | 0.3 (0.1:0.4)    |
|  | Work-time arrangement | Full-time     | . (-)                  | . (-)               | . (-)             | . (-)               | . (-)         | . (-)            | . (-)            |
|  |                       | Part-time     | -37.4 (-38.5:-36.3)    | 13.2 (12.9:13.4)    | -0.1 (-0.2:0.0)   | 1.5 (1.4:1.6)       | 0.0 (0.0:0.0) | 26.2 (26.0:26.4) | 0.4 (0.3:0.4)    |
|  |                       | Not Available | -437.8 (-446.8:-428.7) | 50.5 (48.8:52.3)    | 98.8 (97.1:100.5) | 14.5 (13.7:15.3)    | 0.0 (0.0:0.0) | 30.8 (30.1:31.5) | 20.4 (19.5:21.4) |
|  | AH-survey             | 2012          | -8.6 (-10.3:-7.0)      | 5.5 (5.2:5.9)       | 5.9 (5.7:6.1)     | -2.2 (-2.3:-2.0)    | 0.0 (0.0:0.0) | -0.5 (-0.8:-0.3) | 1.6 (1.5:1.7)    |
|  |                       | 2014          | . (-)                  | . (-)               | . (-)             | . (-)               | . (-)         | . (-)            | . (-)            |
|  |                       | 2012 + 2014   | 26.6 (25.1:28.1)       | -0.8 (-1.1:-0.5)    | -3.2 (-3.3:-3.0)  | -11.2 (-11.3:-11.1) | 0.0 (0.0:0.0) | 4.8 (4.6:5.1)    | -2.0 (-2.1:-1.9) |

Table S1B. Expected average number of days (95% confidence interval) spent in the four recurrent labor market affiliation states (ELMA estimates) for men divided by age group.

| Men - ELMA 4 year follow-up, estimated in days (95% CI) |                       |                                |                        |                     |                     |                     |                    |               |                  |
|---------------------------------------------------------|-----------------------|--------------------------------|------------------------|---------------------|---------------------|---------------------|--------------------|---------------|------------------|
| Age                                                     | Variable              | Level                          | Work                   | Sick                | Unemployment        | Temp. Out           | Disability Pension | Pension       | Death            |
| 18-39                                                   | Intercept             | Reference                      | 1188.8 (1187.4:1190.1) | 28.7 (28.6:28.9)    | 24.2 (23.9:24.5)    | 90.5 (89.9:91.2)    | 0.0 (0.0:0.0)      | 0.0 (0.0:0.0) | -1.5 (-1.8:-1.2) |
|                                                         | Stress                | No                             | . (-)                  | . (-)               | . (-)               | . (-)               | . (-)              | . (-)         | . (-)            |
|                                                         |                       | Work-related                   | -37.1 (-40.4:-33.8)    | 7.3 (7.0:7.6)       | 10.2 (9.7:10.7)     | -16.8 (-18.3:-15.2) | 0.0 (0.0:0.0)      | 0.0 (0.0:0.0) | -3.4 (-4.0:-2.8) |
|                                                         |                       | Work and personal life-related | -46.3 (-49.4:-43.1)    | 26.7 (25.6:27.8)    | 24.3 (23.2:25.4)    | -21.7 (-23.6:-19.7) | 0.0 (0.0:0.0)      | 0.0 (0.0:0.0) | -0.2 (-0.5:0.1)  |
|                                                         | Education             | Low                            | -20.5 (-22.8:-18.2)    | 10.0 (9.7:10.4)     | 13.8 (13.2:14.4)    | -19.1 (-20.3:-18.0) | 0.0 (0.0:0.0)      | 0.0 (0.0:0.0) | 5.4 (4.9:5.9)    |
|                                                         |                       | Middle                         | . (-)                  | . (-)               | . (-)               | . (-)               | . (-)              | . (-)         | . (-)            |
|                                                         |                       | High                           | 95.3 (93.5:97.0)       | -16.1 (-16.3:-15.9) | -14.6 (-14.9:-14.3) | -32.4 (-33.3:-31.6) | 0.0 (0.0:0.0)      | 0.0 (0.0:0.0) | 3.2 (3.0:3.5)    |
|                                                         |                       | Not Available                  | -635.6 (-651.1:-620.2) | 11.4 (8.3:14.6)     | -16.3 (-21.2:-11.4) | 558.3 (540.8:575.7) | 0.0 (0.0:0.0)      | 0.0 (0.0:0.0) | -0.4 (-1.3:0.5)  |
|                                                         | Employment sector     | Private                        | . (-)                  | . (-)               | . (-)               | . (-)               | . (-)              | . (-)         | . (-)            |
|                                                         |                       | Public                         | -125.7 (-127.9:-123.5) | 9.5 (9.2:9.8)       | 9.0 (8.7:9.4)       | 42.3 (41.1:43.5)    | 0.0 (0.0:0.0)      | 0.0 (0.0:0.0) | -0.7 (-0.9:-0.6) |
|                                                         |                       | Not Available                  | 25.1 (23.5:26.8)       | -2.7 (-2.9:-2.5)    | 10.4 (10.0:10.8)    | 21.7 (21.0:22.5)    | 0.0 (0.0:0.0)      | 0.0 (0.0:0.0) | 11.9 (11.5:12.3) |
|                                                         | Work-time arrangement | Full-time                      | . (-)                  | . (-)               | . (-)               | . (-)               | . (-)              | . (-)         | . (-)            |
|                                                         |                       | Part-time                      | -130.3 (-133.3:-127.3) | -5.4 (-5.7:-5.1)    | 13.3 (12.9:13.8)    | 106.8 (104.7:108.8) | 0.0 (0.0:0.0)      | 0.0 (0.0:0.0) | 3.6 (3.1:4.1)    |
|                                                         |                       | Not Available                  | -327.6 (-332.6:-322.6) | 5.7 (5.3:6.1)       | 55.2 (53.7:56.7)    | 145.0 (142.3:147.6) | 0.0 (0.0:0.0)      | 0.0 (0.0:0.0) | 6.6 (5.5:7.6)    |
|                                                         | AH-survey             | 2012                           | 14.2 (12.6:15.7)       | -1.0 (-1.2:-0.8)    | 7.8 (7.5:8.1)       | 23.5 (22.7:24.3)    | 0.0 (0.0:0.0)      | 0.0 (0.0:0.0) | 1.0 (0.8:1.3)    |
|                                                         |                       | 2014                           | . (-)                  | . (-)               | . (-)               | . (-)               | . (-)              | . (-)         | . (-)            |
|                                                         |                       | 2012 + 2014                    | 119.3 (117.1:121.5)    | -5.0 (-5.2:-4.8)    | -6.1 (-6.5:-5.8)    | -39.9 (-40.9:-38.9) | 0.0 (0.0:0.0)      | 0.0 (0.0:0.0) | -1.3 (-1.5:-1.1) |
| 40-49                                                   | Intercept             | Reference                      | 1339.4 (1338.4:1340.5) | 47.7 (47.5:48.0)    | 10.9 (10.7:11.1)    | 22.9 (22.6:23.1)    | 0.4 (0.3:0.4)      | 0.0 (0.0:0.0) | 0.1 (0.1:0.1)    |
|                                                         | Stress                | No                             | . (-)                  | . (-)               | . (-)               | . (-)               | . (-)              | . (-)         | . (-)            |
|                                                         |                       | Work-related                   | -37.2 (-39.7:-34.7)    | 19.0 (18.0:20.0)    | 1.9 (1.4:2.5)       | 9.2 (8.2:10.3)      | 0.2 (0.2:0.2)      | 0.0 (0.0:0.0) | -0.1 (-0.1:-0.1) |
|                                                         |                       | Work and personal life-related | -117.1 (-122.5:-111.7) | 39.8 (38.2:41.4)    | 18.2 (16.8:19.7)    | -0.2 (-0.8:0.3)     | 0.3 (0.2:0.3)      | 0.0 (0.0:0.0) | -0.1 (-0.1:-0.1) |

|       |                       |                                |                        |                     |                  |                     |                  |                  |                  |
|-------|-----------------------|--------------------------------|------------------------|---------------------|------------------|---------------------|------------------|------------------|------------------|
|       | Education             | Low                            | -43.2 (-45.4:-41.0)    | 15.7 (15.0:16.4)    | 3.7 (3.2:4.2)    | 3.3 (2.9:3.7)       | -0.2 (-0.2:-0.2) | 0.0 (0.0:0.0)    | -0.0 (-0.0:-0.0) |
|       |                       | Middle                         | . (-)                  | . (-)               | . (-)            | . (-)               | . (-)            | . (-)            | . (-)            |
|       |                       | High                           | 49.6 (48.3:51.0)       | -27.4 (-27.8:-26.9) | -4.6 (-4.8:-4.3) | -0.6 (-0.8:-0.4)    | -0.3 (-0.3:-0.3) | 0.0 (0.0:0.0)    | -0.0 (-0.0:-0.0) |
|       |                       | Not Available                  | -132.7 (-145.0:-120.4) | -26.5 (-29.3:-23.8) | 5.9 (4.0:7.8)    | 135.3 (123.6:147.0) | -0.4 (-0.4:-0.3) | 0.0 (0.0:0.0)    | 0.2 (0.1:0.3)    |
|       | Employment sector     | Private                        | . (-)                  | . (-)               | . (-)            | . (-)               | . (-)            | . (-)            | . (-)            |
|       |                       | Public                         | -90.1 (-91.9:-88.2)    | 27.4 (26.7:28.1)    | -3.0 (-3.3:-2.7) | 2.3 (2.1:2.6)       | 0.1 (0.1:0.1)    | 0.0 (0.0:0.0)    | 0.2 (0.2:0.2)    |
|       |                       | Not Available                  | -12.2 (-13.4:-11.1)    | 6.1 (5.8:6.4)       | -1.4 (-1.7:-1.1) | 26.6 (26.2:27.0)    | 0.3 (0.3:0.3)    | 0.0 (0.0:0.0)    | 0.1 (0.1:0.1)    |
|       | Work-time arrangement | Full-time                      | . (-)                  | . (-)               | . (-)            | . (-)               | . (-)            | . (-)            | . (-)            |
|       |                       | Part-time                      | -56.5 (-60.6:-52.3)    | 8.5 (7.4:9.5)       | 4.4 (4.1:4.7)    | 8.4 (7.6:9.2)       | 0.0 (-0.0:0.0)   | 0.0 (0.0:0.0)    | 0.3 (0.2:0.3)    |
|       |                       | Not Available                  | -172.9 (-180.1:-165.7) | 48.4 (46.1:50.7)    | 49.4 (46.8:52.0) | 10.8 (8.9:12.8)     | -0.1 (-0.1:-0.0) | 0.0 (0.0:0.0)    | -0.1 (-0.2:-0.1) |
|       | AH-survey             | 2012                           | -24.5 (-25.8:-23.2)    | -0.7 (-1.2:-0.3)    | 11.5 (11.2:11.8) | 10.0 (9.7:10.2)     | -0.0 (-0.0:-0.0) | 0.0 (0.0:0.0)    | 0.2 (0.2:0.2)    |
|       |                       | 2014                           | . (-)                  | . (-)               | . (-)            | . (-)               | . (-)            | . (-)            | . (-)            |
|       |                       | 2012 + 2014                    | 53.6 (52.1:55.0)       | -20.2 (-20.7:-19.8) | -2.7 (-2.9:-2.4) | -13.0 (-13.3:-12.7) | -0.2 (-0.2:-0.2) | 0.0 (0.0:0.0)    | -0.0 (-0.0:-0.0) |
| 50-59 | Intercept             | Reference                      | 1316.4 (1315.4:1317.5) | 48.9 (48.7:49.1)    | 8.6 (8.3:8.9)    | 7.1 (6.9:7.3)       | 2.6 (2.5:2.6)    | 4.1 (3.9:4.2)    | 1.6 (1.5:1.8)    |
|       | Stress                | No                             | . (-)                  | . (-)               | . (-)            | . (-)               | . (-)            | . (-)            | . (-)            |
|       |                       | Work-related                   | -79.6 (-82.1:-77.1)    | 22.0 (21.3:22.7)    | 21.0 (19.9:22.0) | 6.8 (6.0:7.6)       | 3.7 (3.5:3.9)    | 9.4 (8.8:9.9)    | -1.8 (-2.2:-1.3) |
|       |                       | Work and personal life-related | -67.3 (-70.4:-64.2)    | 45.1 (43.3:46.8)    | 16.9 (15.5:18.3) | -2.1 (-2.6:-1.5)    | 3.4 (3.0:3.7)    | 7.1 (6.5:7.7)    | -1.8 (-2.4:-1.1) |
|       | Education             | Low                            | -23.8 (-25.4:-22.2)    | 3.4 (3.0:3.8)       | 9.7 (9.2:10.2)   | -5.6 (-5.9:-5.3)    | 0.1 (0.0:0.2)    | 9.7 (9.4:10.0)   | -0.2 (-0.5:0.2)  |
|       |                       | Middle                         | . (-)                  | . (-)               | . (-)            | . (-)               | . (-)            | . (-)            | . (-)            |
|       |                       | High                           | 21.9 (20.6:23.1)       | -22.6 (-22.9:-22.3) | -2.8 (-3.1:-2.5) | 11.4 (11.0:11.7)    | -1.7 (-1.8:-1.7) | -3.7 (-3.8:-3.6) | -2.2 (-2.5:-1.9) |
|       |                       | Not Available                  | -35.4 (-54.8:-16.0)    | -10.6 (-12.4:-8.8)  | 28.4 (23.1:33.8) | -3.6 (-4.9:-2.3)    | -2.7 (-3.2:-2.1) | -8.2 (-9.2:-7.3) | -0.5 (-1.8:0.8)  |
|       | Employment sector     | Private                        | . (-)                  | . (-)               | . (-)            | . (-)               | . (-)            | . (-)            | . (-)            |
|       |                       | Public                         | -78.3 (-79.7:-77.0)    | 18.1 (17.7:18.5)    | 0.9 (0.5:1.3)    | 5.0 (4.8:5.2)       | 2.6 (2.5:2.7)    | 5.0 (4.8:5.2)    | -1.5 (-1.8:-1.2) |
|       |                       | Not Available                  | 17.8 (16.3:19.2)       | 3.6 (3.4:3.9)       | 5.7 (5.3:6.2)    | 16.3 (15.9:16.7)    | 1.4 (1.3:1.5)    | 4.2 (4.1:4.4)    | -2.3 (-2.6:-1.9) |
|       | Work-time arrangement | Full-time                      | . (-)                  | . (-)               | . (-)            | . (-)               | . (-)            | . (-)            | . (-)            |
|       |                       | Part-time                      | -121.5 (-125.9:-117.1) | 12.9 (12.2:13.7)    | 19.6 (18.6:20.6) | -5.1 (-5.6:-4.5)    | 3.1 (2.9:3.3)    | -1.2 (-1.5:-1.0) | 27.8 (25.2:30.4) |

|  |           |               |                        |                     |                  |                  |                  |               |                  |
|--|-----------|---------------|------------------------|---------------------|------------------|------------------|------------------|---------------|------------------|
|  |           | Not Available | -185.1 (-191.6:-178.6) | 26.1 (25.0:27.2)    | 54.9 (52.6:57.3) | -4.0 (-4.5:-3.4) | 9.6 (9.2:10.1)   | 1.0 (0.7:1.2) | -0.3 (-0.4:-0.2) |
|  | AH-survey | 2012          | -59.0 (-60.3:-57.8)    | 5.8 (5.5:6.0)       | 17.5 (17.1:17.9) | 5.6 (5.3:5.9)    | -0.7 (-0.8:-0.6) | 3.9 (3.8:4.0) | 1.2 (1.0:1.4)    |
|  |           | 2014          | . (-)                  | . (-)               | . (-)            | . (-)            | . (-)            | . (-)         | . (-)            |
|  |           | 2012 + 2014   | 14.6 (13.4:15.7)       | -15.2 (-15.4:-14.9) | -1.9 (-2.2:-1.6) | -7.4 (-7.6:-7.1) | -2.1 (-2.2:-2.0) | 8.3 (8.1:8.4) | 3.5 (3.1:3.9)    |
